# Supplementary material for: Impacts of Internet Use on Chinese Patients’ Trust-Related Primary Healthcare Utilization
Source: MDPI journal article supplement (doi:10.3390/healthcare10102114), 2022-10-21
Supplement: s1 [file s1]

**Supplementary Table S1.** Estimation of the marginal effect on primary healthcare-seeking of different urbanization cities, aging, primary healthcare

| Hospital                           | dy/dx                     | Delta-method<br>Std. Err. | t      | P     |
|------------------------------------|---------------------------|---------------------------|--------|-------|
| low-level urbanization cities      |                           |                           |        |       |
| Internet time                      |                           |                           |        |       |
| trust                              |                           |                           |        |       |
| 1                                  | -0.0026(-0.0030~-0.0022)  | 0.0002                    | -12.65 | 0     |
| 2                                  | -0.0017(-0.0022~-0.0013)  | 0.0002                    | -7.45  | 0     |
| 3                                  | -0.0009(-0.0014~-0.0003)  | 0.0003                    | -3.20  | 0.001 |
| 4                                  | -0.00004(-0.0007~0.0006)  | 0.0003                    | -0.10  | 0.923 |
| 5                                  | 0.00082(0.00006~0.0016)   | 0.0004                    | 2.13   | 0.033 |
| 6                                  | 0.0017(0.0008~0.0025)     | 0.0004                    | 3.75   | 0     |
| 7                                  | 0.0025(0.0015~0.0035)     | 0.0005                    | 4.96   | 0     |
| 8                                  | 0.0034(0.0022~0.0044)     | 0.0006                    | 5.89   | 0     |
| 9                                  | 0.0042(0.0030~0.0055)     | 0.0006                    | 6.62   | 0     |
| 10                                 | 0.0051(0.0037~0.0064)     | 0.0007                    | 7.21   | 0     |
| high levels of urbanization cities |                           |                           |        |       |
| Internet time                      |                           |                           |        |       |
| trust                              |                           |                           |        |       |
| 1                                  | -0.0018(-0.0023~-0.0014)  | 0.0002                    | -7.84  | 0     |
| 2                                  | -0.0008(-0.0013~-0.0003)  | 0.0003                    | -2.93  | 0.003 |
| 3                                  | 0.0002(-0.0004~0.0009)    | 0.0003                    | 0.68   | 0.497 |
| 4                                  | 0.0012(0.0005~0.0020)     | 0.0004                    | 3.28   | 0.001 |
| 5                                  | 0.0023(0.0014~0.0031)     | 0.0004                    | 5.18   | 0     |
| 6                                  | 0.0033(0.0023~0.0043)     | 0.0005                    | 6.60   | 0     |
| 7                                  | 0.0043(0.0032~0.0054)     | 0.0006                    | 7.70   | 0     |
| 8                                  | 0.0053(0.0041~0.0066)     | 0.0006                    | 8.56   | 0     |
| 9                                  | 0.0064(0.0050~0.0077)     | 0.0007                    | 9.25   | 0     |
| 10                                 | 0.0074(0.0059~0.0089)     | 0.0008                    | 9.82   | 0     |
| low aging level                    |                           |                           |        |       |
| Internet time                      |                           |                           |        |       |
| trust                              |                           |                           |        |       |
| 1                                  | -0.0024 (-0.0028~-0.0019) | 0.0002                    | -10.1  | 0     |
| 2                                  | -0.0016 (-0.0022~-0.0011) | 0.0003                    | -5.95  | 0     |
| 3                                  | -0.0009 (-0.0015~-0.0002) | 0.0003                    | -2.68  | 0.007 |
| 4                                  | -0.0001 (-0.0009~-0.0006) | 0.0004                    | -0.31  | 0.758 |
| 5                                  | 0.0006 (-0.0003~-0.0015)  | 0.0005                    | 1.39   | 0.164 |
| 6                                  | 0.0014 (0.0004~0.0024)    | 0.0005                    | 2.64   | 0.008 |
| 7                                  | 0.0021(0.0010~0.0033)     | 0.0006                    | 3.58   | 0     |
| 8                                  | 0.0029 (0.0016~0.0042)    | 0.0007                    | 4.3    | 0     |
| 9                                  | 0.0036 (0.0022~0.0051)    | 0.0007                    | 4.88   | 0     |
| 10                                 | 0.0044 (0.0028~0.0060)    | 0.0008                    | 5.34   | 0     |

---

high aging level

Internet time

trust

|    |                           |        |        |       |
|----|---------------------------|--------|--------|-------|
| 1  | -0.0022 (-0.0026~-0.0018) | 0.0002 | -10.82 | 0     |
| 2  | -0.0011 (-0.0016~-0.0007) | 0.0002 | -4.88  | 0     |
| 3  | -0.0001 (-0.0006~0.0004)  | 0.0003 | -0.37  | 0.714 |
| 4  | 0.0009 (0.0003~0.0016)    | 0.0003 | 2.91   | 0.004 |
| 5  | 0.0020 (0.0012~0.0027)    | 0.0004 | 5.29   | 0     |
| 6  | 0.0030 (0.0022~0.0038)    | 0.0004 | 7.07   | 0     |
| 7  | 0.0040 (0.0031~0.0050)    | 0.0005 | 8.42   | 0     |
| 8  | 0.0051 (0.0040~0.0061)    | 0.0005 | 9.48   | 0     |
| 9  | 0.0061 (0.0049~0.0073)    | 0.0006 | 10.33  | 0     |
| 10 | 0.0071 (0.0059~0.0084)    | 0.0006 | 11.02  | 0     |

low-level medical service areas

Internet time

trust

|    |                           |        |       |       |
|----|---------------------------|--------|-------|-------|
| 1  | -0.0021 (-0.0026~-0.0016) | 0.0003 | -7.92 | 0     |
| 2  | -0.0012 (-0.0018~-0.0006) | 0.0003 | -4.03 | 0     |
| 3  | -0.0004 (-0.0011~0.0003)  | 0.0004 | -1.05 | 0.296 |
| 4  | 0.0005 (-0.0003~0.0013)   | 0.0004 | 1.15  | 0.251 |
| 5  | 0.0013 (0.0004~0.0023)    | 0.0005 | 2.77  | 0.006 |
| 6  | 0.0022 (0.0011~0.0033)    | 0.0006 | 3.98  | 0     |
| 7  | 0.0031 (0.0018~0.0043)    | 0.0006 | 4.92  | 0     |
| 8  | 0.0039 (0.0026~0.0053)    | 0.0007 | 5.66  | 0     |
| 9  | 0.0048 (0.0033~0.0063)    | 0.0008 | 6.25  | 0     |
| 10 | 0.0056 (0.0040~0.0073)    | 0.0008 | 6.73  | 0     |

high-levels medical service areas

Internet time

trust

|    |                           |        |        |       |
|----|---------------------------|--------|--------|-------|
| 1  | -0.0028 (-0.0032~-0.0024) | 0.0002 | -14.08 | 0     |
| 2  | -0.0018 (-0.0023~-0.0014) | 0.0002 | -7.86  | 0     |
| 3  | -0.0008 (-0.0014~-0.0003) | 0.0003 | -3.04  | 0.002 |
| 4  | 0.0001 (-0.0005~0.0008)   | 0.0003 | 0.42   | 0.676 |
| 5  | 0.0011 (0.0004~0.0019)    | 0.0004 | 2.89   | 0.004 |
| 6  | 0.0021 (0.0012~0.0030)    | 0.0004 | 4.71   | 0     |
| 7  | 0.0031 (0.0021~0.0041)    | 0.0005 | 6.08   | 0     |
| 8  | 0.0041 (0.0030~0.0052)    | 0.0006 | 7.13   | 0     |
| 9  | 0.0051 (0.0038~0.0063)    | 0.0006 | 7.97   | 0     |
| 10 | 0.0061 (0.0047~0.0074)    | 0.0007 | 8.65   | 0     |

---

The TOPSIS method consists of the following steps:

1. Determine the original matrix and normalize the decision matrix.

Collect the original data, determine the evaluation object and evaluation index, and get the original data matrix. And in general, there are benefit attributes and cost attributes in the MADM (Multiattribute Decision-making) problems. In order to measure all attributes in dimensionless units and facilitate inter-attribute comparisons, we introduce the following formulas to normalize each attribute value in decision original matrix into a corresponding element  $A_{ij}$ .

$$A_{ij} = \frac{a_{ij}}{\sqrt{\sum_{i=1}^n a_{ij}^2}} \quad (1)$$

for benefit attribute  $a_{ij}$ , And

$$A_{ij} = 1 - \frac{a_{ij}}{\sqrt{\sum_{i=1}^n a_{ij}^2}} \quad (2)$$

for cost attribute  $a_{ij}$ .

2. Determine the positive and negative ideal solutions.

The PIS  $A^+$  and NIS  $A^-$  are determined, respectively, as follows:

$$A^+ = (a_1^+, a_2^+, a_3^+ \cdots a_m^+),$$

$$A^- = (a_1^-, a_2^-, a_3^- \cdots a_m^-),$$

among,

$$A_j^+ = \max_{1 \leq i \leq n} \{a_{ij}\} \quad (3)$$

$$A_j^- = \min_{1 \leq i \leq n} \{a_{ij}\} \quad (4)$$

$$j = 1, 2, 3, \dots, m$$

3. Measure the distance from positive and negative ideal solutions.

The separation of each alternative from the PIS,  $D_i^+$ , is given as:

$$D_i^+ = \sqrt{\sum_j^m (a_{ij} - a_{ij}^+)^2} \quad (5)$$

Similarly, the separation from the NIS,  $D_i^-$  is given as:

$$D_i^- = \sqrt{\sum_j^m (a_{ij} - a_{ij}^-)^2} \quad (6)$$

4. Calculate the closeness coefficient to the ideal solutions.

The closeness coefficient of the  $i$ th alternative  $A_i$  with respect to the ideal solutions is defined as:  $C_i = D_i^- / (D_i^+ + D_i^-)$

5. Rank the preference order.

A set of alternatives then can be ranked by preference according to the descending order of  $C_i$ ; in other words, larger  $C_i$  means better alternative.

**Supplementary Table S2. TOPSIS results**

| province     | $C_i$  | sequence |
|--------------|--------|----------|
| Shanghai     | 0.0661 | 1        |
| Jiangsu      | 0.0512 | 2        |
| Guangdong    | 0.0464 | 3        |
| Shandong     | 0.0459 | 4        |
| Henan        | 0.0441 | 5        |
| Sichuan      | 0.0441 | 6        |
| Hubei        | 0.042  | 7        |
| Anhui        | 0.0419 | 8        |
| Hunan        | 0.0379 | 9        |
| Tianjin      | 0.0368 | 10       |
| Yunnan       | 0.0361 | 11       |
| Chongqing    | 0.0354 | 12       |
| Guangxi      | 0.0346 | 13       |
| Zhejiang     | 0.034  | 14       |
| Beijing      | 0.0338 | 15       |
| Hebei        | 0.0324 | 16       |
| Hainan       | 0.0291 | 17       |
| Guizhou      | 0.0285 | 18       |
| Jiangxi      | 0.028  | 19       |
| Xinjiang     | 0.0269 | 20       |
| Heilongjiang | 0.0268 | 21       |
| Fujian       | 0.0252 | 22       |
| Liaoning     | 0.024  | 23       |
| Shanxi       | 0.0226 | 24       |
| Gansu        | 0.0217 | 25       |
| Shanxi       | 0.0201 | 26       |
| Ningxia      | 0.0196 | 27       |
| Qinghai      | 0.0193 | 28       |
| Neimenggu    | 0.0186 | 29       |
| Jilin        | 0.018  | 30       |
| Xizang       | 0.0088 | 31       |
